# Supplementary material for: Ladder-type dithienocyclopentadibenzothiophene-cored wide-bandgap polymers for efficient non-fullerene solar cells with large open-circuit voltages
Source: Royal Society of Chemistry journal article supplement (doi:10.1039/c8ta11404h), 2019-01-01
Supplement: c8ta11404h1.pdf [file c8ta11404h1.pdf]

## Electronic supplementary information

### Ladder-Type Dithienocyclopentadibenzothiophene-Cored Wide-Bandgap Polymers for Efficient Non-Fullerene Solar Cells with Large Open-Circuit Voltages

Qisheng Tu,<sup>a,b</sup> Changquan Tang,<sup>a,b</sup> and Qingdong Zheng<sup>a,\*</sup>

<sup>a</sup> State Key Laboratory of Structural Chemistry, Fujian Institute of Research on the Structure of Matter, Chinese Academy of Sciences, 155 Yangqiao West Road, Fuzhou, Fujian 350002, China. E-mail: qingdongzheng@fjirsm.ac.cn.

<sup>b</sup> University of Chinese Academy of Sciences, 19 Yuquan Road, Beijing 100049, China.

**Table S1** Photovoltaic parameters of PSCs based on **PSS2**/EH-IDTBR (1:2.5, w/w), under the illumination of AM 1.5G (100 mW/cm<sup>2</sup>)

| DPE Additive (v/v) | Annealing temperature [°C] | $V_{oc}$ [V] | $J_{sc}$ [mA cm <sup>-2</sup> ] | FF [%] | PCE [%] <sup>a</sup> |
|--------------------|----------------------------|--------------|---------------------------------|--------|----------------------|
| 0                  | None                       | 1.042        | 11.96                           | 55.2   | 6.88 (6.61±0.17)     |
| 1%                 | None                       | 1.051        | 13.72                           | 53.0   | 7.64 (7.44±0.15)     |
| 0                  | 120                        | 1.049        | 12.35                           | 56.2   | 7.28 (7.17±0.10)     |
| 1% <sup>b</sup>    | None                       | 1.053        | 13.16                           | 53.6   | 7.43 (7.35±0.05)     |

<sup>a</sup> In parentheses are averaged values based on 8 devices. <sup>b</sup> The devices were quenched with methanol at room temperature.

**Table S2** Hole and electron mobilities of the PSCs based on polymer:EH-IDTBR (1:2.5, w/w)

| Active layer                      | $\mu_h$ (cm <sup>2</sup> V <sup>-1</sup> s <sup>-1</sup> ) | $\mu_e$ (cm <sup>2</sup> V <sup>-1</sup> s <sup>-1</sup> ) | $\mu_h/\mu_e$ ratio |
|-----------------------------------|------------------------------------------------------------|------------------------------------------------------------|---------------------|
| <b>PSS2:EH-IDTBR</b> <sup>a</sup> | 6.60×10 <sup>-6</sup>                                      | 1.10×10 <sup>-5</sup>                                      | 0.60                |
| <b>PSS2:EH-IDTBR</b> <sup>b</sup> | 2.85×10 <sup>-5</sup>                                      | 2.10×10 <sup>-5</sup>                                      | 1.36                |
| <b>PSS3:EH-IDTBR</b> <sup>b</sup> | 1.34×10 <sup>-5</sup>                                      | 4.52×10 <sup>-5</sup>                                      | 0.30                |

<sup>a</sup> Calculated by using the SCLC model from the as-cast blend film. <sup>b</sup> Calculated by using the SCLC model from blends with quenching treatment (120 °C).

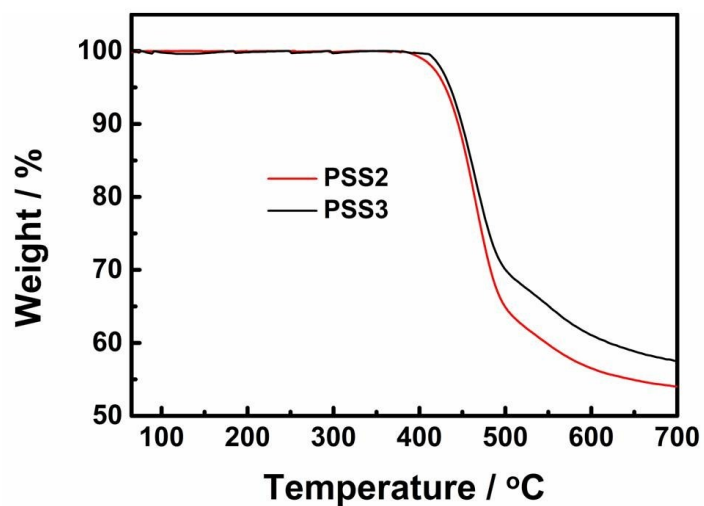

Fig. S1 TGA curves of copolymers with a heating rate of 10 °C/min under N<sub>2</sub> atmosphere.

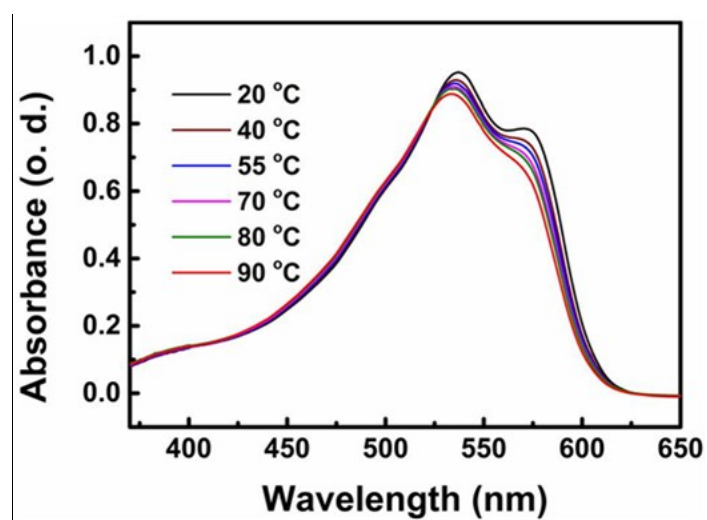

Fig. S2 Temperature-dependent absorption spectra of PSS2 in CB solution ( $1 \times 10^{-5}$  M).

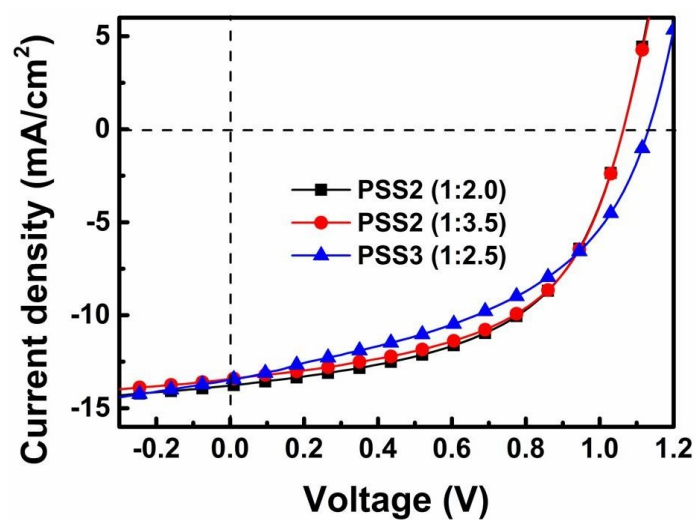

Fig. S3 J-V characteristics of the devices based on polymer:EH-IDTBR with different blend ratios.

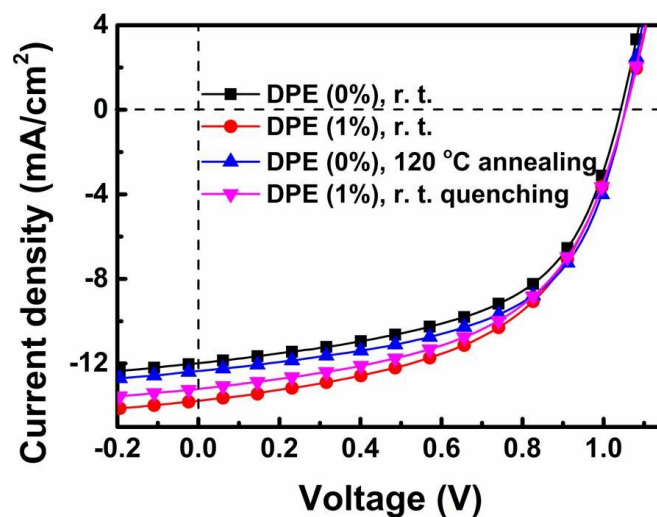

Fig. S4 *J-V* characteristics of PSS2-based devices under different processing conditions.

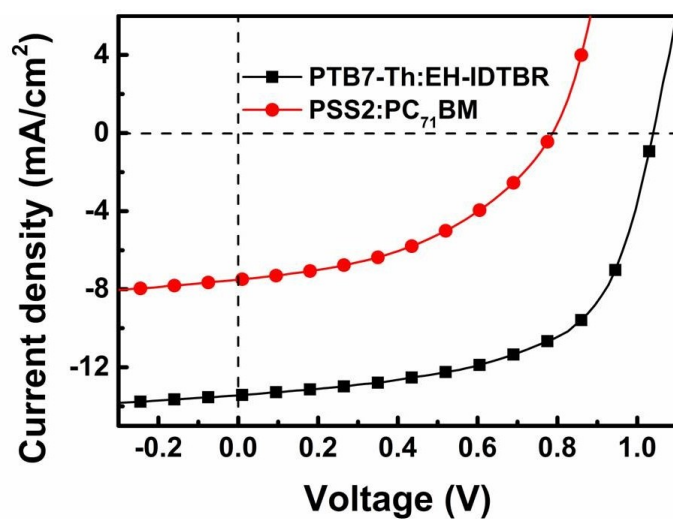

Fig. S5 *J-V* characteristics of devices based on PSS2:PC<sub>71</sub>BM and PTB7-Th:EH-IDTBR.

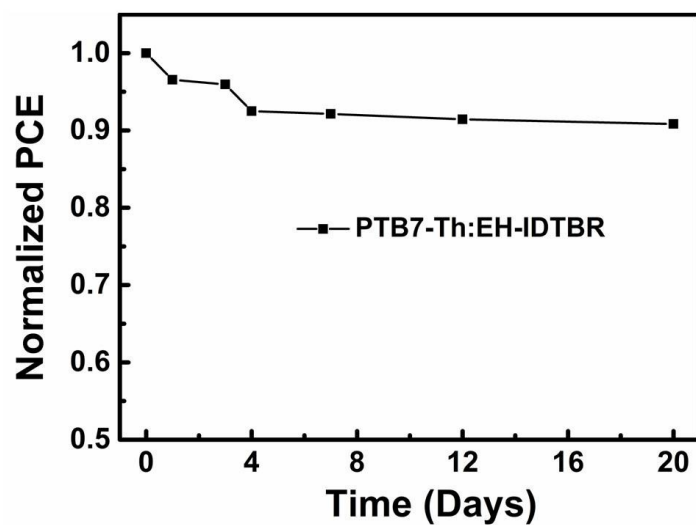

Fig. S6 Shelf stability of the best-performance PSC based on PTB7-Th:EH-IDTBR.

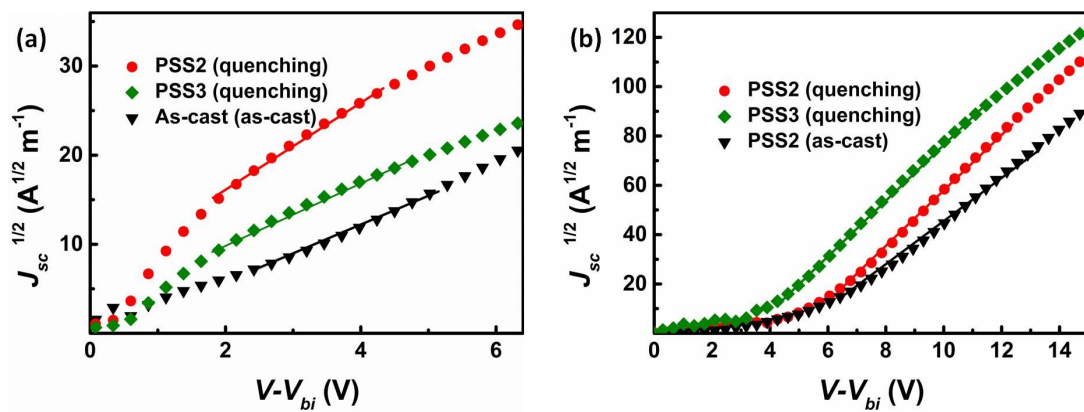

**Fig. S7**  $J^{1/2}$ - $V$  characteristics of (a) hole- and (b) electron-only devices based on the polymer blends.
